# Supplementary material for: Identification of Novel Deregulated RNA Metabolism-Related Genes in Non-Small Cell Lung Cancer
Source: PubMed Central journal article supplement (PMC3410905; doi:10.1371/journal.pone.0042086), 2012-08-02
Supplement: pone.0042086.s001.pdf [file pone.0042086.s001.pdf]

**Table S1.** RNA metabolism-related genes with significant differences in its expression between lung adenocarcinoma and normal lung tissue.

| Gene           | p value |          |          | Fold-change |          |          |
|----------------|---------|----------|----------|-------------|----------|----------|
|                | Harvard | Michigan | Tel Aviv | Harvard     | Michigan | Tel Aviv |
| <b>ADAR2</b>   | < 0.001 | < 0.001  | 0.004    | -2.037      | -1.851   | -2.054   |
| <b>ASCC3L1</b> | < 0.001 | 0.001    | 0.003    | 0.526       | 0.743    | 0.955    |
| <b>MARS</b>    | < 0.001 | 0.009    | 0.009    | 0.712       | 0.504    | 0.384    |
| <b>MRPL3</b>   | < 0.001 | < 0.001  | 0.009    | 1.812       | 0.826    | 1.044    |
| <b>PABPC1</b>  | < 0.001 | < 0.001  | 0.009    | 0.551       | 1.099    | 0.554    |
| <b>RAE1</b>    | < 0.001 | 0.005    | 0.005    | 0.735       | 0.536    | 1.155    |
| <b>RNPS1</b>   | 0.001   | 0.007    | < 0.001  | 0.365       | 0.418    | 0.922    |
| <b>SNRPB</b>   | 0.007   | < 0.001  | 0.003    | 0.411       | 0.757    | 0.699    |
| <b>SNRPC</b>   | 0.002   | 0.004    | 0.001    | 0.987       | 1.992    | 1.009    |
| <b>SNRPE</b>   | < 0.001 | <0.001   | 0.001    | 0.815       | 1.067    | 1.272    |

*Significance of the ANOVA test and mean fold-change (FC) of the representing probes in the adenocarcinoma cases are shown. FC was calculated by the formula:  $FC = \log_2(T/N)$ , where  $T$  and  $N$  denote non-normalized mean gene expression in tumor and normal samples, respectively.*
