# Supplementary material for: Identification of Novel Deregulated RNA Metabolism-Related Genes in Non-Small Cell Lung Cancer
Source: PubMed Central journal article supplement (PMC3410905; doi:10.1371/journal.pone.0042086), 2012-08-02
Supplement: pone.0042086.s002.pdf [file pone.0042086.s002.pdf]

**Table S2.** Statistical validation of selected genes using microarray data from a fourth cohort of lung cancer patients (Yap et al., 2005).

| <b>Gene</b>    | <b>p value</b> | <b><i>Fold-change</i></b> |
|----------------|----------------|---------------------------|
| <b>ADAR2</b>   | <0.001         | -1.179                    |
| <b>ASCC3L1</b> | <0.001         | 1.066                     |
| <b>MARS</b>    | 0.006          | 1.147                     |
| <b>MRPL3</b>   | <0.001         | 1.852                     |
| <b>PABPC1</b>  | <0.001         | 1.455                     |
| <b>RAE1</b>    | 0.002          | 0.937                     |
| <b>RNPS1</b>   | <0.001         | 1.278                     |
| <b>SNRPB</b>   | 0.002          | 1.269                     |
| <b>SNRPC</b>   | 0.005          | 0.925                     |
| <b>SNRPE</b>   | 0.004          | 1.028                     |

*Significance of the ANOVA test and fold-change (FC) of the representing probes in the adenocarcinoma cases are shown. FC was calculated by the formula:  $FC = \log_2 (T/N)$ , where  $T$  and  $N$  denote mean gene expression in tumor and normal samples, respectively.*
