# Supplementary material for: Identification of Novel Deregulated RNA Metabolism-Related Genes in Non-Small Cell Lung Cancer
Source: PubMed Central journal article supplement (PMC3410905; doi:10.1371/journal.pone.0042086), 2012-08-02
Supplement: pone.0042086.s003.pdf [file pone.0042086.s003.pdf]

**Table S3.** Number of cases and histological types in the microarray experiments used in the study.

| Database                                         | Normal | Adenocarcinoma | Squamous | SCLC | Carcinoid |
|--------------------------------------------------|--------|----------------|----------|------|-----------|
| Harvard<br>(Bhattacharjee<br>et al., 2001)       | 17     | 139            | 21       | 6    | 20        |
| Michigan<br>(Beer et al., 2001)                  | 10     | 86             | -        | -    | -         |
| Tel Aviv<br>(Dehan et al., 2007)                 | 9      | 7              | 17       | -    | -         |
| Hong Kong<br>(Yap et al., 2005)                  | 9      | 49             | -        | -    | -         |
| Multicenter consortium<br>(Shedden et al., 2008) | -      | 442            | -        | -    | -         |
