# Supplementary material for: Identification of Novel Deregulated RNA Metabolism-Related Genes in Non-Small Cell Lung Cancer
Source: PubMed Central journal article supplement (PMC3410905; doi:10.1371/journal.pone.0042086), 2012-08-02
Supplement: pone.0042086.s004.pdf [file pone.0042086.s004.pdf]

**Table S4.** Pathological characteristics of the primary tumors.

| <b>Patient</b> | <b>Histology</b>        | <b>Stage</b> | <b>Patient</b> | <b>Histology</b>        | <b>Stage</b> |
|----------------|-------------------------|--------------|----------------|-------------------------|--------------|
| 1              | Squamous cell carcinoma | IB           | 25             | Squamous cell carcinoma | IA           |
| 2              | Squamous cell carcinoma | IIB          | 26             | Squamous cell carcinoma | IA           |
| 3              | Squamous cell carcinoma | IB           | 27             | Adenocarcinoma          | IB           |
| 4              | Adenocarcinoma          | IIIA         | 28             | Adenocarcinoma          | IA           |
| 5              | Squamous cell carcinoma | IB           | 29             | Adenocarcinoma          | IB           |
| 6              | Squamous cell carcinoma | IB           | 30             | Squamous cell carcinoma | IIB          |
| 7              | Squamous cell carcinoma | IB           | 31             | Squamous cell carcinoma | IIIA         |
| 8              | Squamous cell carcinoma | IIIA         | 32             | Squamous cell carcinoma | IIA          |
| 9              | Squamous cell carcinoma | IIB          | 33             | Squamous cell carcinoma | IA           |
| 10             | Adenocarcinoma          | IA           | 34             | Mixed                   | IIB          |
| 11             | Squamous cell carcinoma | IB           | 35             | Squamous cell carcinoma | IIB          |
| 12             | Squamous cell carcinoma | IB           | 36             | Squamous cell carcinoma | IB           |
| 13             | Mixed                   | IB           | 37             | Squamous cell carcinoma | IB           |
| 14             | Squamous cell carcinoma | IIB          | 38             | Squamous cell carcinoma | IB           |
| 15             | Adenocarcinoma          | IIB          | 39             | Adenocarcinoma          | IB           |
| 16             | Adenocarcinoma          | IIA          | 40             | Adenocarcinoma          | IIB          |
| 17             | Adenocarcinoma          | IA           | 41             | Adenocarcinoma          | IA           |
| 18             | Squamous cell carcinoma | IB           | 42             | Adenocarcinoma          | IB           |
| 19             | Adenocarcinoma          | IB           | 43             | Adenocarcinoma          | IIIA         |
| 20             | Large cell carcinoma    | IIB          | 44             | Adenocarcinoma          | IIB          |
| 21             | Adenocarcinoma          | IIA          | 45             | Adenocarcinoma          | IIIA         |
| 22             | Squamous cell carcinoma | IB           | 46             | Adenocarcinoma          | IIB          |
| 23             | Adenocarcinoma          | IIIB         | 47             | Adenocarcinoma          | IB           |
| 24             | Squamous cell carcinoma | IB           | 48             | Adenocarcinoma          | IB           |
