# Supplementary material for: Identification of Novel Deregulated RNA Metabolism-Related Genes in Non-Small Cell Lung Cancer
Source: PubMed Central journal article supplement (PMC3410905; doi:10.1371/journal.pone.0042086), 2012-08-02
Supplement: pone.0042086.s005.pdf [file pone.0042086.s005.pdf]

**Table S5.** Primers used for conventional PCR.

| Gene           | Primer | Sequence (5' → 3')       | Position  | Accession number | Cycles |
|----------------|--------|--------------------------|-----------|------------------|--------|
| <b>ADAR2</b>   | S      | CACCTCTCTACACCCTCAACAAG  | 2245-2267 | gi:75709170      | 30     |
|                | AS     | CGTAGTAAGTGGGAGGGAACCTT  | 2457-2479 |                  |        |
| <b>ASCC3L1</b> | S      | GTGTCTGCTCTGAGAAACAGTGC  | 4011-4033 | gi:40217846      | 25     |
|                | AS     | CTGTCAGGAGTACCACCTTCTTG  | 4292-4314 |                  |        |
| <b>GAPDH</b>   | S      | ACTTTGTCAAGCTCATTTC      | 1019-1038 | gi:83641890      | 25     |
|                | AS     | CACAGGGTACTTTATTGATG     | 1284-1303 |                  |        |
| <b>MARS</b>    | S      | CTCCAGCACTATCACCAGCTACT  | 2088-2110 | gi:14043021      | 20     |
|                | AS     | GTGTCCTGCTGGTAAGGTACACA  | 2380-2402 |                  |        |
| <b>MRPL3</b>   | S      | GCCTATACATCCTTGGGAAACCAG | 419-441   | gi:21265090      | 25     |
|                | AS     | GTGAGCAGCATAAAGAGGAGTGC  | 733-755   |                  |        |
| <b>PABPC1</b>  | S      | CAGGCTCACCTCACTAACCAGTA  | 1627-1649 | gi:56676313      | 20     |
|                | AS     | GAACCTGTGAAGAAGCTGGTCTC  | 1902-1924 |                  |        |
| <b>RAE1</b>    | S      | ATGACTGGGAGCTGGGATAAGAC  | 798-820   | gi:62739174      | 25     |
|                | AS     | AGCAACTCTCCCCTCGATACTTC  | 1066-1088 |                  |        |
| <b>RNPS1</b>   | S      | TAGGGCTCCTTACCTACCAAAC   | 320-342   | gi:18379335      | 25     |
|                | AS     | AAGGACTGGAGAGCCAGAAGAG   | 608-630   |                  |        |
| <b>SNRPB</b>   | S      | CAGAAAGGGAAGAGAAGCGAGTC  | 339-361   | gi:38150006      | 20     |
|                | AS     | GTACCTCTTCTTGTTGGGGTCAT  | 587-609   |                  |        |
| <b>SNRPC</b>   | S      | CTACTCCATTCTCTGCTCCTCCT  | 206-228   | gi:4507126       | 25     |
|                | AS     | CCTCCCCTCTATCCTTATCTGTC  | 487-509   |                  |        |
| <b>SNRPE</b>   | S      | TAGATCGCGGATTCAGGTG      | 129-147   | gi:61098048      | 25     |
|                | AS     | AGCATGATCCGACCCAGTT      | 266-284   |                  |        |

*Sense (S) and antisense (AS) primer sequences are shown. Their position in the transcript, the accession number of the transcript, and the number of cycles used in each PCR are also shown.*
