# Supplementary material for: Identification of Novel Deregulated RNA Metabolism-Related Genes in Non-Small Cell Lung Cancer
Source: PubMed Central journal article supplement (PMC3410905; doi:10.1371/journal.pone.0042086), 2012-08-02
Supplement: pone.0042086.s006.pdf [file pone.0042086.s006.pdf]

**Table S6.** Primers used for real-time PCR.

| Gene           | Primer | Sequence (5' → 3')       | Position  | Accession number |
|----------------|--------|--------------------------|-----------|------------------|
| <b>ADAR2</b>   | S      | GTACCAGCGGATCTCCAACATAG  | 2213-2235 | gi:75709170      |
|                | AS     | CTACCGTCCAGTTGACACTGAAG  | 2324-2346 |                  |
| <b>ASCC3L1</b> | S      | CTCATCTCCATCAAGAGGCTGAC  | 6312-6334 | gi:40217846      |
|                | AS     | CTCCTGGTCACATCCCATGTAAG  | 6421-6443 |                  |
| <b>HPRT</b>    | S      | TGACACTGGCAAAACAATGCA    | 578-598   | gi:164518913     |
|                | AS     | GGTCCTTTTCACCAGCAAGCT    | 651-671   |                  |
| <b>MARS</b>    | S      | TACACAGACCAGTGGGAGAGATG  | 1617-1639 | gi:14043021      |
|                | AS     | GAGGTGGCTGACCAAGGTATAGT  | 1744-1766 |                  |
| <b>MRPL3</b>   | S      | TGCTGCTCACTTTCGTCCA      | 746-764   | gi:21265090      |
|                | AS     | TCGTTTGACCATGCGTAGC      | 849-867   |                  |
| <b>PABPC1</b>  | S      | CAACCCTGTAATCAACCCCTACC  | 1683-1705 | gi:56676313      |
|                | AS     | GCGAGGACTTGGTCTTAGTTGAG  | 1790-1812 |                  |
| <b>RAE1</b>    | S      | CCTCAGCAGTAACCAAGCGATAC  | 707-729   | gi:62739174      |
|                | AS     | GTCTTATCCCAGCTCCCAGTCAT  | 798-820   |                  |
| <b>SNRPB</b>   | S      | CAGAAAGGGAAGAGAAGCGAGTC  | 339-361   | gi:38150006      |
|                | AS     | TCCAGCAAGTGGAAGTTCGAGCAA | 438-460   |                  |
| <b>SNRPE</b>   | S      | TAGATCGCGGATTCAGGTG      | 129-147   | gi:61098048      |
|                | AS     | AGCATGATCCGACCCAGTT      | 266-284   |                  |

*Sense (S) and antisense (AS) primer sequences are shown, as well as their position in the transcript and its accession number.*
