# Supplementary material for: Identification of Novel Deregulated RNA Metabolism-Related Genes in Non-Small Cell Lung Cancer
Source: PubMed Central journal article supplement (PMC3410905; doi:10.1371/journal.pone.0042086), 2012-08-02
Supplement: pone.0042086.s007.pdf [file pone.0042086.s007.pdf]

**Table S7.** Microsatellites analyzed at 21q22.3.

| Microsatellite  | Primers (5'→3')            | Amplicon (bp) | AT (°C) | Repetition       | Max. heterozygosity |
|-----------------|----------------------------|---------------|---------|------------------|---------------------|
| <b>D21S1235</b> | S: CTTTCATGTGTGTCTACGGAT   | 102-134       | 58      | Dinucleotides    | 0.78                |
|                 | AS: GGCTACTCTCTGCCAGAT     |               |         |                  |                     |
| <b>D21S1224</b> | S: GAAGGAGCTATACCCGGACT    | 140-154       | 55      | Dinucleotides    | 0.83                |
|                 | AS: GCTAGTAGCTACCATATTGG   |               |         |                  |                     |
| <b>D21S1411</b> | S: ATGATGAATGCATAGATGGAT   | 266-314       | 58      | Tetranucleotides | 0.93                |
|                 | AS: AATGTGTGTCCTTCCAGGC    |               |         |                  |                     |
| <b>D21S1259</b> | S:GGGACTGTAATAAATATTCTGTT  | 202-224       | 53      | Dinucleotides    | 0.67                |
|                 | AS: CACTGGCTCTCCTGACC      |               |         |                  |                     |
| <b>D21S1912</b> | S: CCCTCATAACAGATTTAAAACAC | 172-202       | 55      | Dinucleotides    | 0.80                |
|                 | AS: GAGCCCACCCTGGTAAC      |               |         |                  |                     |
| <b>D21S171</b>  | S: TAGGCCCTACTGCAATAATG    | 106-124       | 55      | Dinucleotides    | 0.80                |
|                 | AS: CTTTATCTTCACACAGCTTC   |               |         |                  |                     |
| <b>D21S1574</b> | S: GAAGACTGCTTGAGCACAGG    | 168-182       | 62      | Dinucleotides    | 0.78                |
|                 | AS: TGCATTCCTGGTGTAACCC    |               |         |                  |                     |
| <b>D21S1446</b> | S: ATGTACGATACGTAATACTTGA  | 203-227       | 55      | Tetranucleotides | 0.78                |
|                 | AS: GTCCCAAAGGACCTGCTC     |               |         |                  |                     |

*Microsatellites are ordered from the most centromeric to the most telomeric. Table shows primer sequences (S: Sense; AS: Antisense), amplicon length intervals, annealing temperatures (AT) used in the PCR, types of repetition, and maximum heterozygosities.*
