# Supplementary material for: Identification of Novel Deregulated RNA Metabolism-Related Genes in Non-Small Cell Lung Cancer
Source: PubMed Central journal article supplement (PMC3410905; doi:10.1371/journal.pone.0042086), 2012-08-02
Supplement: pone.0042086.s008.pdf [file pone.0042086.s008.pdf]

**Table S8.** Demographic and clinical characteristics of the 213 patients selected from the cohort of adenocarcinoma patients (Shedden et al., 2008).

|                               |           |
|-------------------------------|-----------|
| <b>Age - years</b>            |           |
| Median                        | 65        |
| SD                            | 10        |
| <b>Gender - n (%)</b>         |           |
| Female                        | 116 (54%) |
| Male                          | 97 (46%)  |
| <b>Smoking status - n (%)</b> |           |
| Nonsmoker                     | 27 (13%)  |
| Former                        | 160 (78%) |
| Current                       | 19 (9%)   |
| NA                            | 7         |
| <b>Stage - n (%)</b>          |           |
| I                             | 157 (74%) |
| II                            | 35 (17%)  |
| III                           | 19 (9%)   |
| IV                            | 0 (0%)    |
| NA                            | 2         |

*NA: not available*
